# Supplementary material
Source: publisher figshare collection journal article supplement (https://acs.figshare.com/ndownloader/files/4015114)
Supplement: Supplementary file 1 [file 4015114]

Supporting Information

**Endoglucanase Peripheral Loops Facilitate Complexation of Glucan Chains on Cellulose via Adaptive Coupling to Emergent Substrate Structures**

Yuchun Lin<sup>†,‡</sup>, Gregg T. Beckham<sup>§,⊥</sup>, Michael E. Himmel<sup>||</sup>, Michael F. Crowley<sup>||</sup>,

and Jih-Wei Chu<sup>†,∇,○,\*</sup>

<sup>†</sup>Department of Chemical and Biomolecular Engineering, University of California, Berkeley, Berkeley, California, United States

<sup>‡</sup>State Key Laboratory of Oral Diseases, West China Hospital of Stomatology, Sichuan University, Chengdu, Sichuan, 610041, PRC

<sup>§</sup>National Bioenergy Center, National Renewable Energy Laboratory, Golden, CO, USA

<sup>⊥</sup>Department of Chemical Engineering, Colorado School of Mines, Golden, CO, USA

<sup>||</sup>Biosciences Center, National Renewable Energy Laboratory, Golden, CO, USA

<sup>∇</sup>Department of Biological Science and Technology, National Chiao Tung University, Hsinchu, Taiwan, ROC

<sup>○</sup>Institute of Bioinformatics and Systems Biology, National Chiao Tung University, Hsinchu, Taiwan, ROC

*Keywords:* Interfacial biocatalysis; endoglucanase; cellulose; complexation; free-energy simulation; coarse-graining; multiscale simulation

Fig. S1 Segments strongly couple to the 11 glucose residues of the TGC as a function of  $\xi$  during the two pathways of complexation. -7: non-reducing end of TGC; +4: reducing end of TGC. Bold:

---

\*Corresponding Author: Jih-Wei Chu. Address: 208 Lab Building 1, 75 Bo-Ai St., National Chiao Tung University, Hsinchu, Taiwan, ROC. Tel: 886-3-5712121 ext: 56996. Email: jwchu@nctu.edu.tw.

strength of mechanical coupling is larger than  $2.5 \text{ kcal/mol/\AA}^2$ ; Light: strength of mechanical coupling is larger than  $1.5 \text{ kcal/mol/\AA}^2$ . Nearby segments are colored as blue: L1 and HP1; red: L7; green: L2 and  $\beta 1$ ; black: others.

| $\xi$ | Scooping |         |         |     |                   |                        |               |                    |               |           |    | Threading |    |         |         |         |                   |                            |                        |               |                    |                   |    |
|-------|----------|---------|---------|-----|-------------------|------------------------|---------------|--------------------|---------------|-----------|----|-----------|----|---------|---------|---------|-------------------|----------------------------|------------------------|---------------|--------------------|-------------------|----|
|       | -7       | -6      | -5      | -4  | -3                | -2                     | -1            | +1                 | +2            | +3        | +4 | -7        | -6 | -5      | -4      | -3      | -2                | -1                         | +1                     | +2            | +3                 | +4                |    |
| 0.00  |          |         |         |     |                   |                        | L7            |                    |               |           |    |           |    |         |         |         |                   |                            |                        |               |                    |                   |    |
| 0.03  | HP1      |         |         |     |                   |                        | L7            |                    |               |           |    |           |    |         |         |         |                   |                            |                        |               |                    | L7                |    |
| 0.07  | HP1      |         |         |     |                   |                        | L7            |                    |               |           |    |           |    |         |         | HP1     |                   |                            |                        |               |                    | L7                |    |
| 0.10  | HP1      |         |         |     |                   |                        | L7            | L7                 |               |           |    |           |    |         |         | HP1     |                   |                            |                        |               |                    | L7                |    |
| 0.13  |          |         |         |     |                   |                        | L7            |                    |               |           |    |           |    |         |         | HP1     |                   |                            |                        |               |                    |                   |    |
| 0.17  |          |         |         |     |                   |                        | L7            |                    |               |           |    |           |    |         |         |         |                   |                            | HP1                    |               |                    |                   |    |
| 0.20  |          |         | HP1     |     |                   |                        | L7            |                    |               |           |    |           |    |         |         |         |                   |                            |                        |               |                    |                   |    |
| 0.23  |          |         |         |     |                   |                        | L7            |                    |               |           |    |           |    |         |         |         |                   | HP1                        | HP1                    |               |                    |                   |    |
| 0.27  |          |         |         |     |                   |                        | L7            | L7                 |               |           |    |           |    |         |         |         |                   |                            |                        |               |                    |                   |    |
| 0.30  |          |         |         |     |                   |                        | L7            | L7                 |               |           |    |           |    |         |         |         | HP1               | HP1                        |                        |               |                    |                   |    |
| 0.33  |          |         |         |     |                   |                        | L7            |                    |               |           |    |           |    |         |         |         | HP1               |                            |                        |               |                    |                   |    |
| 0.37  |          |         | HP1     |     |                   |                        | L7            |                    |               |           |    |           |    |         |         |         | HP1               |                            |                        | L7            | L7                 | L7                |    |
| 0.40  |          |         | HP1     | HP1 |                   |                        | L7            |                    |               |           |    |           |    | HP1     |         |         |                   |                            |                        | L7            | L7                 | $\beta 4, L7$     |    |
| 0.43  |          |         | HP1     | HP1 |                   |                        |               |                    |               |           |    |           |    | HP1     |         |         |                   |                            |                        | L7            | L7                 | $\beta 4, L7$     |    |
| 0.47  |          | HP1     | HP1     | HP1 |                   |                        |               |                    | L7            |           |    |           |    |         |         | L1      |                   |                            |                        | L7            | L7                 | $\beta 4$         |    |
| 0.50  |          | HP1     |         |     |                   |                        |               |                    | L7            |           |    |           |    |         |         | L1      |                   |                            | L1, L2                 | L2, $\beta 1$ | L7                 | L7                |    |
| 0.53  |          | HP1     | HP1     | HP1 |                   |                        | L7            |                    |               | $\beta 6$ |    |           |    | HP1     | L1, HP1 | L1, HP1 |                   | L1, L2                     | L2, $\beta 1$          |               | L7                 | L7                |    |
| 0.57  |          |         | HP1     |     |                   |                        | L7            |                    |               | $\beta 6$ |    |           |    | HP1     | HP1     | HP1     |                   | L1, L2                     | L2, $\beta 1$          | L7            | L7                 | L7                |    |
| 0.60  |          |         | HP1     |     | L1                |                        | L7            | L7                 |               | $\beta 6$ |    |           |    | HP1     | L1, HP1 | HP1     | L1, HP1           | L1                         | L7                     | L7            | L7                 | L7                |    |
| 0.63  |          |         | HP1     |     | L1                |                        | L7            | L7, $\beta 4$      | L7            |           |    |           |    | L1, HP1 | L1, HP1 | L1, HP1 | L1                | L1                         | L7                     | L7            | L7                 |                   |    |
| 0.67  |          |         | HP1     |     | L1                | L7                     | L7            | L7                 | L7            |           |    |           |    | L1, HP1 | L1, HP1 | L1, HP1 | L1                | L1, L2                     | L7                     | L7            | L7                 |                   |    |
| 0.70  |          | HP1     | HP1     | L1  |                   | L7                     | L7            | L7, $\beta 4$      | L7            |           |    |           |    | L1, HP1 | L1, HP1 | L1, HP1 | L1, L2            | L1, L2                     |                        | L7            | L7                 |                   |    |
| 0.73  |          | HP1     | HP1     | L1  | L1, L2, $\beta 1$ | L7                     | L7            | L7                 | L7            |           |    |           |    | L1, HP1 | L1, HP1 | L1, HP1 | L1, L2            | L1, L2, $\beta 1$          |                        |               | L7                 |                   |    |
| 0.77  |          | HP1     | HP1     | L1  | L1, L2, $\beta 1$ | L7, $\beta 1$          | L7            | L7                 | L5, L7        |           |    |           |    | L1, HP1 | L1      | L1, HP1 | L1                | L1, $\beta 1$              | L7                     | L7            | L7                 |                   |    |
| 0.80  |          | HP1     | HP1     | L1  | L1, L2, $\beta 1$ | L7, $\beta 1$          | L7            | L7, $\beta 6$      | L7            |           |    |           |    | L1, HP1 | L1      | L1, HP1 | L1, L2            | L1, $\beta 1$              | L7                     | L7            | L7                 |                   |    |
| 0.83  |          | L1, HP1 | HP1     | L1  | L1, L2, $\beta 1$ | L7, $\beta 1, \beta 2$ | L7            | $\beta 4, \beta 6$ | L5, $\beta 6$ |           |    |           |    | L1      | L1, HP1 | L1      | L1, L2, $\beta 1$ | L7, $\beta 1$              | L7                     | L7            | L7                 |                   |    |
| 0.87  |          | L1, HP1 | L1, HP1 | L1  | L1, L2, $\beta 1$ | L7, $\beta 1, \beta 2$ | L7            | $\beta 4, \beta 6$ | L5, $\beta 6$ | L5        |    |           |    | HP1     | L1, HP1 | L1, HP1 | L1, L2            | L1, L2, $\beta 1$          | L7, $\beta 1$          | L7            |                    | L7                |    |
| 0.90  | HP1      | L1, HP1 | L1, HP1 | L1  | L1, L2, $\beta 1$ | L7, $\beta 1, \beta 2$ | L7, $\beta 3$ | $\beta 4, \beta 6$ | L5, $\beta 6$ | L5        |    |           |    | HP1     | HP1     | L1, HP1 | L1, L2            | L7, L2, $\beta 1$          | L7, $\beta 1$          | $\beta 4, L7$ | L5, L7             | L7                |    |
| 0.93  | L1, HP1  | L1, HP1 | L1, HP1 | L1  | L1, L2, $\beta 1$ | L7, $\beta 1, \beta 2$ | L7, $\beta 3$ | $\beta 4, \beta 6$ | L5, $\beta 6$ | L5        |    |           |    | L1, HP1 | HP1     | L1      | L1, L2            | L7, L2, $\beta 1, \beta 2$ | L7, $\beta 3$          | L7            | L5, L7             | L7                |    |
| 0.97  | L1, HP1  | L1, HP1 | L1, HP1 | L1  | L1, L2, $\beta 1$ | L7, $\beta 1, \beta 2$ | L7, $\beta 3$ | $\beta 4, \beta 6$ | L5, $\beta 6$ | L5        |    |           |    | L1, HP1 | L1      | L1, HP1 | L1                | L1, L2, $\beta 1$          | L7, $\beta 1, \beta 2$ | L7, $\beta 3$ | L7, $\beta 4$      | L5, L7, $\beta 6$ |    |
| 1.00  | L1, HP1  | L1, HP1 | L1, HP1 | L1  | L1, L2, $\beta 1$ | L7, $\beta 1, \beta 2$ | L7, $\beta 3$ | $\beta 4, \beta 6$ | $\beta 6$     | L5        |    |           |    | L1, HP1 | L1, HP1 | L1, HP1 | L1                | L1, L2, $\beta 1$          | L7, $\beta 1, \beta 2$ | L7, $\beta 3$ | $\beta 4, \beta 6$ | $\beta 6$         | L5 |

Fig. S2 Segments strongly couple to the glucose sites of NNC in parallel to the 11 glucose residues of the TGC as a function of  $\xi$  during the two pathways of complexation. Numberings from -7 to +4 represent residues in NNC parallel to the targeted glucan chain. -7: non-reducing end of TGC; +4: reducing end of TGC. Bold: strength of mechanical coupling is larger than 2.5 kcal/mol/Å<sup>2</sup>; Light: strength of mechanical coupling is larger than 1.5 kcal/mol/Å<sup>2</sup>.

| $\xi$ | Scooping |     |     |     |    |    |    |    |    |    |    | Threading |     |     |     |     |     |         |     |    |    |        |
|-------|----------|-----|-----|-----|----|----|----|----|----|----|----|-----------|-----|-----|-----|-----|-----|---------|-----|----|----|--------|
|       | -7       | -6  | -5  | -4  | -3 | -2 | -1 | +1 | +2 | +3 | +4 | -7        | -6  | -5  | -4  | -3  | -2  | -1      | +1  | +2 | +3 | +4     |
| 0.00  | HP1      |     |     | HP1 |    | L7 |    |    |    |    |    |           |     |     |     |     |     |         |     |    |    |        |
| 0.03  | HP1      |     | HP1 | HP1 |    | L7 | L7 |    |    |    |    |           |     |     |     |     |     |         |     |    |    | L7     |
| 0.07  | HP1      |     | HP1 |     |    | L7 | L7 | L7 |    |    |    |           |     |     |     |     |     | L2      |     | L7 | L7 |        |
| 0.10  |          |     |     |     |    | L7 | L7 | L7 |    |    |    |           |     |     |     |     |     | HP1, L2 |     | L7 | L7 |        |
| 0.13  |          |     |     |     |    | L7 | L7 | L7 |    |    |    |           |     |     |     |     |     | HP1, L2 |     | L7 | L7 |        |
| 0.17  |          |     |     |     |    | L7 | L7 |    |    |    |    |           |     |     |     |     |     |         |     |    |    | L7     |
| 0.20  |          |     |     |     |    | L7 | L7 |    |    |    |    |           |     |     |     |     |     |         |     |    |    | L7     |
| 0.23  |          |     |     | HP1 |    | L7 | L7 |    |    |    |    |           |     |     |     |     | HP1 |         | HP1 |    |    |        |
| 0.27  |          |     |     | HP1 |    | L7 | L7 |    |    |    |    |           |     |     |     |     | HP1 | HP1     | HP1 |    |    | L7     |
| 0.30  |          |     |     | HP1 |    | L7 | L7 |    |    |    |    |           |     |     |     |     | HP1 | HP1     | HP1 |    | L7 | L7     |
| 0.33  |          |     |     |     |    | L7 | L7 |    |    |    |    |           |     |     |     |     | HP1 | HP1     |     |    | L7 | L7     |
| 0.37  |          |     | HP1 | HP1 |    | L7 | L7 | L7 |    |    |    |           |     |     | HP1 |     | HP1 | HP1     |     | L7 | L7 | L7, L8 |
| 0.40  |          |     | HP1 | HP1 |    | L7 | L7 | L7 |    |    |    |           |     |     | HP1 |     | HP1 | HP1     |     |    | L7 | L7, L8 |
| 0.43  |          | HP1 | HP1 | HP1 |    | L7 | L7 |    |    |    |    |           |     |     | HP1 | HP1 | HP1 | HP1     |     |    | L7 | L7, L8 |
| 0.47  |          | HP1 | HP1 | HP1 |    | L7 | L7 | L7 |    |    |    |           |     |     | HP1 |     | HP1 | HP1     |     | L7 | L7 |        |
| 0.50  |          | HP1 | HP1 | HP1 |    | L7 | L7 | L7 | L8 |    |    |           |     |     | HP1 | HP1 |     | HP1     | HP1 |    | L7 | L7     |
| 0.53  |          |     | HP1 | HP1 |    | L7 | L7 | L7 | L8 |    |    |           |     |     | HP1 | HP1 | HP1 | HP1     | HP1 | L7 | L7 | L7     |
| 0.57  |          |     | HP1 |     |    | L7 | L7 | L7 | L8 |    |    |           |     |     | HP1 | HP1 | HP1 | HP1     |     | L7 | L7 | L7     |
| 0.60  |          |     | HP1 | HP1 | L7 | L7 | L7 | L7 | L8 |    |    |           |     |     | HP1 | HP1 | HP1 | HP1     | L7  | L7 | L7 | L7     |
| 0.63  |          |     | HP1 | HP1 | L7 | L7 | L7 | L7 | L8 |    |    |           |     | HP1 |     | HP1 | HP1 | HP1     | L7  | L7 | L7 | L8     |
| 0.67  |          | HP1 | HP1 | HP1 | L7 | L7 | L7 | L7 | L8 |    |    |           |     | HP1 | HP1 | HP1 | HP1 | HP1     | L7  | L7 | L7 | L8     |
| 0.70  |          | HP1 | HP1 | HP1 |    | L7 | L7 | L7 | L8 |    |    |           |     | HP1 |     | HP1 | HP1 | HP1     | L7  | L7 | L7 |        |
| 0.73  |          | HP1 | HP1 |     |    | L7 | L7 |    |    |    |    |           |     |     | HP1 | HP1 |     | L7      | L7  | L7 |    |        |
| 0.77  |          | HP1 | HP1 |     |    | L7 | L7 |    |    |    |    |           |     |     | HP1 | HP1 |     | L7      | L7  | L7 |    |        |
| 0.80  |          | HP1 | HP1 |     |    | L7 | L7 |    |    |    |    |           |     |     | HP1 | HP1 |     |         | L7  | L7 |    |        |
| 0.83  |          | HP1 | HP1 | HP1 |    | L7 | L7 |    |    |    |    |           |     |     | HP1 | HP1 |     |         | L7  | L7 |    |        |
| 0.87  |          | HP1 | HP1 | HP1 |    | L7 | L7 |    |    |    |    |           |     |     | HP1 | HP1 | HP1 |         | L7  | L7 |    |        |
| 0.90  |          | HP1 | HP1 | HP1 |    | L7 | L7 |    |    |    |    |           |     |     | HP1 | HP1 | HP1 |         | L7  | L7 | L7 |        |
| 0.93  |          | HP1 | HP1 |     |    | L7 | L7 |    |    |    |    | HP1       | HP1 | HP1 | HP1 |     | L7  | L7      | L7  |    |    |        |
| 0.97  |          | HP1 | HP1 | HP1 |    | L7 | L7 | L7 |    |    |    | HP1       | HP1 | HP1 | HP1 |     | L7  |         |     |    |    |        |
| 1.00  |          | HP1 | HP1 | HP1 |    | L7 | L7 | L7 |    |    |    |           | HP1 | HP1 | HP1 | HP1 |     | L7      | L7  | L7 |    |        |

Fig. S3 Segments strongly couple to the glucose sites of RNC in parallel to the 11 glucose residues of the TGC as a function of  $\xi$  during the two pathways of complexation. Numberings from -7 to +4 represent residues in RNC parallel to the targeted glucan chain. -7: non-reducing end of TGC; +4: reducing end of TGC. Bold: strength of mechanical coupling is larger than 2.5 kcal/mol/Å<sup>2</sup>; Light: strength of mechanical coupling is larger than 1.5 kcal/mol/Å<sup>2</sup>.

| $\xi$ | Scooping |     |     |    |    |           |           |    |    |    |    | Threading  |     |     |     |     |     |         |     |    |    |    |
|-------|----------|-----|-----|----|----|-----------|-----------|----|----|----|----|------------|-----|-----|-----|-----|-----|---------|-----|----|----|----|
|       | -7       | -6  | -5  | -4 | -3 | -2        | -1        | +1 | +2 | +3 | +4 | -7         | -6  | -5  | -4  | -3  | -2  | -1      | +1  | +2 | +3 | +4 |
| 0.00  |          |     |     |    |    | H3        | <b>H3</b> |    |    |    |    |            |     |     |     |     |     |         |     |    |    | H3 |
| 0.03  |          |     | L2  |    |    | H3        | <b>H3</b> |    |    |    |    |            |     |     |     |     |     |         |     |    | H3 | H3 |
| 0.07  |          |     |     |    |    | <b>H3</b> | <b>H3</b> |    |    |    |    |            |     |     |     |     |     |         | L2  |    | H3 | H3 |
| 0.10  |          |     |     |    |    | <b>H3</b> | <b>H3</b> | H3 |    |    |    |            |     |     |     |     | HP1 | L2      |     |    | H3 | H3 |
| 0.13  |          |     |     |    |    | H3        | H3        |    |    |    |    |            |     |     |     |     | HP1 | HP1, L2 |     |    |    | H3 |
| 0.17  |          |     |     |    |    |           | H3        |    |    |    |    |            |     |     |     |     | HP1 | HP1     | HP1 |    |    |    |
| 0.20  |          |     |     |    |    |           |           |    |    |    |    |            |     |     |     |     | HP1 | HP1     |     |    |    |    |
| 0.23  |          |     |     |    |    |           |           |    |    |    |    |            |     |     |     |     | HP1 | HP1     |     |    |    | H3 |
| 0.27  |          |     |     |    |    |           |           |    |    |    |    |            |     |     |     |     |     |         |     |    |    | H3 |
| 0.30  |          |     |     |    |    |           |           |    |    |    |    |            |     |     |     |     |     |         |     |    | H3 | H3 |
| 0.33  |          |     |     |    |    |           |           |    |    |    |    |            |     |     |     |     |     |         |     |    |    |    |
| 0.37  |          |     |     |    |    |           |           |    |    |    |    |            |     |     |     |     |     |         |     |    | H3 | H3 |
| 0.40  |          |     |     |    |    |           |           |    |    |    |    |            |     |     |     |     |     |         |     |    | H3 | H3 |
| 0.43  |          |     |     |    |    |           |           |    |    |    |    |            |     |     |     |     |     |         |     |    | H3 | H3 |
| 0.47  |          |     |     |    |    |           |           |    |    |    |    |            |     |     |     | HP1 |     |         |     |    |    | H3 |
| 0.50  |          |     |     |    |    |           |           |    |    |    |    |            |     |     | HP1 | HP1 | HP1 |         |     |    |    |    |
| 0.53  |          |     |     |    |    |           |           |    |    |    |    |            |     |     | HP1 |     | HP1 |         |     |    |    |    |
| 0.57  |          |     |     |    |    |           |           |    |    |    |    |            |     |     | HP1 |     |     |         |     |    |    |    |
| 0.60  |          |     |     |    |    |           | H3        |    |    |    |    |            |     |     |     |     |     |         |     |    |    |    |
| 0.63  |          |     |     |    |    |           |           |    |    |    |    |            |     |     |     |     |     |         |     |    |    |    |
| 0.67  |          |     |     |    |    |           |           |    |    |    |    |            |     |     |     |     |     |         |     | H3 |    |    |
| 0.70  |          |     |     |    |    |           |           |    |    |    |    |            |     |     |     |     |     |         |     |    |    |    |
| 0.73  |          |     |     |    |    |           | H3        | H3 |    |    |    |            |     |     |     |     |     |         |     |    |    |    |
| 0.77  |          |     |     |    |    |           | H3        | H3 |    |    |    |            |     |     |     |     |     |         |     |    |    |    |
| 0.80  |          |     |     |    |    |           |           | H3 |    |    |    |            |     |     |     |     |     |         |     | H3 |    |    |
| 0.83  |          |     |     |    |    |           | H3        | H3 |    |    |    |            | HP1 |     |     |     |     |         |     | H3 |    |    |
| 0.87  |          |     |     |    |    |           | H3        | H3 |    |    |    |            | HP1 |     |     |     |     | L7      |     |    |    |    |
| 0.90  |          |     |     |    |    |           | H3        | H3 | L8 |    |    |            | HP1 |     |     |     |     | L7      |     |    |    |    |
| 0.93  | HP1      |     |     |    |    |           |           | H3 |    |    |    |            |     |     |     |     |     | L7      |     |    |    |    |
| 0.97  |          | HP1 |     |    |    |           |           | H3 | L8 |    |    | <b>HP1</b> | HP1 | HP1 |     |     |     | L7      |     |    |    |    |
| 1.00  | HP1      | HP1 | HP1 |    |    |           | L7        |    |    |    |    | HP1        | HP1 | HP1 |     |     |     | L7      |     |    |    |    |

Fig. S4 The coupling strengths of the HP1 and L7 segments of Cel7B CD to the TGC and NNC parts of cellulose during the threading pathway of complexation. The profiles of individual protein residues with strong coupling strengths are also shown to illustrate the underlying details.

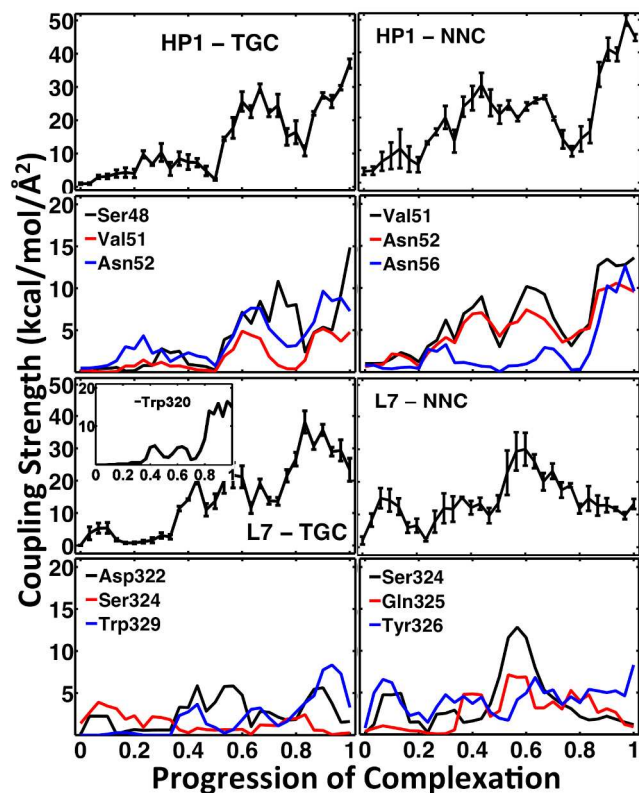

Fig. S5 The coupling strengths of Cel7B CD to different parts of cellulose in all the three models: (Top) coupling of Cel7B CD to TGC and NNC; (Middle) coupling of Cel7B CD to RNC; (Bottom) coupling of Cel7B CD to whole cellulose.

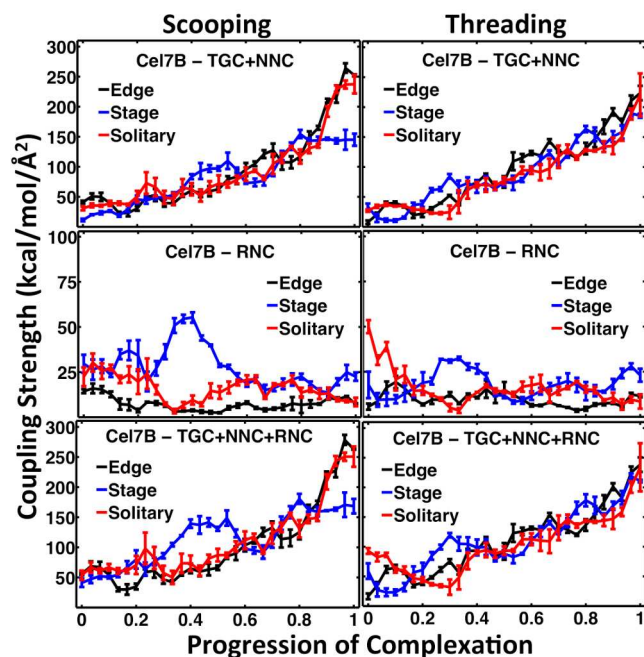

Fig. S6 Percentage of residue at specific positions in the globally aligned 340 homologues of the Cel7B CD collected from the NCBI database. Residue name is represented by 1-Letter; residue missed in homology is represented by dash symbol.

|   | HP1   |       |       | L2    |       |       | L7    |       |       |       | L8    |       |
|---|-------|-------|-------|-------|-------|-------|-------|-------|-------|-------|-------|-------|
|   | S48   | V51   | N52   | Y94   | S99   | Y102  | N323  | S324  | Q325  | Y326  | N334  | S340  |
| A | 0.29  | 1.18  | 0.00  | 0.00  | 2.35  | 2.35  | 4.71  | 19.71 | 34.12 | 1.18  | 25.88 | 9.12  |
| C | 0.29  | 0.00  | 0.00  | 0.00  | 0.00  | 0.00  | 0.00  | 0.00  | 0.00  | 1.47  | 0.00  | 0.00  |
| D | 0.88  | 25.88 | 1.77  | 0.29  | 1.18  | 0.59  | 8.53  | 2.94  | 4.41  | 4.41  | 8.53  | 0.88  |
| E | 0.29  | 1.47  | 0.59  | 0.29  | 0.59  | 1.47  | 5.29  | 1.18  | 0.29  | 1.18  | 9.71  | 1.47  |
| F | 0.00  | 0.00  | 0.88  | 2.65  | 0.29  | 0.00  | 0.29  | 0.29  | 0.29  | 6.77  | 0.00  | 0.00  |
| G | 3.53  | 0.29  | 0.88  | 0.00  | 29.12 | 29.12 | 0.29  | 9.41  | 10.59 | 12.06 | 4.71  | 5.59  |
| H | 0.00  | 0.00  | 0.00  | 0.29  | 6.47  | 0.59  | 42.65 | 4.71  | 0.00  | 2.35  | 0.29  | 1.18  |
| I | 0.00  | 0.00  | 0.00  | 5.00  | 0.29  | 1.18  | 0.00  | 0.00  | 0.00  | 0.00  | 0.29  | 5.59  |
| K | 1.18  | 0.29  | 0.00  | 1.47  | 0.00  | 4.71  | 2.35  | 0.29  | 0.00  | 1.18  | 4.12  | 2.35  |
| L | 0.00  | 0.29  | 0.00  | 6.77  | 0.00  | 0.29  | 0.29  | 0.29  | 0.88  | 0.00  | 1.77  | 0.29  |
| M | 0.29  | 0.00  | 0.00  | 0.59  | 0.00  | 0.00  | 0.00  | 0.59  | 0.00  | 0.00  | 0.00  | 0.00  |
| N | 59.12 | 2.35  | 4.71  | 0.00  | 5.88  | 4.12  | 9.12  | 3.82  | 1.18  | 48.53 | 15.29 | 2.06  |
| P | 0.29  | 0.00  | 1.18  | 0.00  | 0.88  | 0.00  | 2.94  | 0.29  | 0.29  | 0.29  | 2.65  | 4.41  |
| Q | 0.00  | 0.29  | 0.00  | 0.00  | 0.00  | 14.12 | 1.77  | 1.18  | 5.88  | 2.94  | 2.94  | 2.65  |
| R | 0.00  | 0.00  | 0.29  | 0.88  | 0.00  | 0.59  | 0.29  | 0.29  | 0.59  | 0.00  | 0.29  | 1.47  |
| S | 13.24 | 3.53  | 5.29  | 0.00  | 19.12 | 22.65 | 0.59  | 12.65 | 13.53 | 6.47  | 10.00 | 17.35 |
| T | 0.29  | 38.24 | 0.29  | 0.29  | 2.06  | 2.06  | 0.29  | 5.59  | 1.77  | 0.00  | 2.06  | 38.24 |
| V | 0.00  | 6.47  | 0.29  | 64.41 | 0.00  | 0.59  | 0.88  | 1.18  | 13.53 | 0.00  | 6.47  | 2.35  |
| W | 0.00  | 0.00  | 5.00  | 0.88  | 1.47  | 0.00  | 0.00  | 0.00  | 0.00  | 1.18  | 0.00  | 0.29  |
| Y | 0.29  | 0.00  | 0.00  | 11.47 | 3.82  | 7.65  | 13.53 | 18.53 | 0.00  | 6.47  | 0.88  | 0.00  |
| - | 19.41 | 19.71 | 78.82 | 4.71  | 26.47 | 7.94  | 6.18  | 17.06 | 12.65 | 4.41  | 4.12  | 4.71  |

Fig. S7 Alignment of the sequences of the residue blocks: position 50 to 47 in segments HP1 and position 323 to 327 in L7 of EG I (Cel7B: 1EG1) and CBH I (Cel7A: 1CEL) from *T. reesei*.

|       | Residues 50~57 in HP1 | Residues 323~326 in L7 |
|-------|-----------------------|------------------------|
| Cel7B | TVNGGVNT              | NSQY                   |
| Cel7A | YD-GTWSS              | YYAN                   |

## **SUPPORTING MOVIE LEGENDS**

Movie S1. The movie of scooping pathway viewed from side view.

Movie S2. The movie of scooping pathway viewed from top view.

Movie S3. The movie of threading pathway viewed from side view.

Movie S4. The movie of threading pathway viewed from top view.
